# Supplementary material for: Persistent interaction patterns across social media platforms and over time
Source: PubMed Central journal article supplement (PMC11023927; doi:10.1038/s41586-024-07229-y), 2024-03-20
Supplement: 41586_2024_7229_MOESM1_ESM.pdf [file 41586_2024_7229_MOESM1_ESM.pdf]

---

**Supplementary information**

---

**Persistent interaction patterns across social media platforms and over time**

---

In the format provided by the authors and unedited

# Persistent Interaction Patterns Across Social Media Platforms and Over Time

Michele Avalle<sup>1†</sup>, Niccolò Di Marco<sup>1†</sup>, Gabriele Etta<sup>1†</sup>, Emanuele Sangiorgio<sup>2</sup>, Shayan Alipour<sup>1</sup>, Anita Bonetti<sup>1</sup>, Lorenzo Alvisi<sup>1</sup>, Antonio Scala<sup>3</sup>, Andrea Baronchelli<sup>4,5</sup>, Matteo Cinelli<sup>1\*</sup> and Walter Quattrociocchi<sup>1\*</sup>

<sup>1\*</sup>Department of Computer Science, Sapienza University of Rome, Viale Regina Elena 295, Rome, 00161, Italy.

<sup>2</sup>Department of Social Sciences and Economics, Sapienza University of Rome, Piazzale Aldo Moro 5, Rome, 00185, Italy.

<sup>3</sup>Institute of Complex Systems, CNR, Via dei Taurini 19, Rome, 00185, Italy.

<sup>4</sup>City University of London, Department of Mathematics, London, EC1V0HB, UK.

<sup>5</sup>The Alan Turing Institute 96 Euston Road, London, NW12DB, UK.

\*Corresponding author(s). E-mail(s): [matteo.cinelli@uniroma1.it](mailto:matteo.cinelli@uniroma1.it); [walter.quattrociocchi@uniroma1.it](mailto:walter.quattrociocchi@uniroma1.it);

†These authors contributed equally to this work.

## Contents

|          |                                               |           |
|----------|-----------------------------------------------|-----------|
| <b>1</b> | <b>Data Collection for validation dataset</b> | <b>2</b>  |
| <b>2</b> | <b>Supplementary Tables</b>                   | <b>3</b>  |
| <b>3</b> | <b>Supplementary Figures</b>                  | <b>16</b> |
| <b>4</b> | <b>Software and Coding specifications</b>     | <b>19</b> |
| 4.1      | Softwares Employed . . . . .                  | 20        |
| 4.2      | List of R packages . . . . .                  | 20        |

# 1 Data Collection for validation dataset

**Facebook** We collect data regarding Sports and Film topics from datasets of Italian news outlet page posts and comments described in [1]. Concerning the Sports topic, we collect a total of  $\sim 494K$  comments ranging from 2015-01-01 to 2017-08-19 and using the following keywords:  $\{sport, serie A, serieA, calcio, tennis, pallavolo, nuoto\}$ . For the Film topic instead, we collect a total of  $\sim 493K$  comments ranging from 2015-01-01 to 2017-08-10, using the following keywords:  $\{film, cinema, regista, registi, cinematografia\}$ .

**Reddit** We collect data from subreddits which are known for hosting conversations about a multitude of topics, namely  $r/AskReddit$  and  $r/IAMa$ , together with a third subreddit, named  $r/Movies$ , which contains conversations about movies. Concerning  $r/AskReddit$ , we collect a total of ( $\sim 2.3M$  comments) from 2021-02-01 to 2021-02-15. For  $r/IAMa$ , instead, we collect a total of  $\sim 500K$  comments between 2021-02-01 and 2022-12-31). Finally, for  $r/movies$ , we collect  $\sim 11M$  comments from 2021-02-01 to 2022-12-31.

**Telegram** We collect data related to *Crypto* topic from a channel named *WatcherGuru* from 2021-08-13 to 2023/06/22, for a total of  $\sim 150K$  comments.

**Twitter** We collect data about the *Game of Thrones* (GoT) and *NASA* topics. Concerning the first, we retrieve all comments containing the hashtag *#gameofthrones* from 2019-01-01 to 2022-12-24, accounting for  $\sim 442K$  comments. For *NASA*, instead, we collect comments from posts shared by the official *NASA* account on Twitter between 2019-01-01 and 2022-12-29 for a total of  $\sim 346K$  comments.

**Voat** We collect data from two Q&A generic subverses, namely *askvoat* and *whatever*. Concerning the first, we collect  $\sim 612K$  comments from 2014-06-19 to 2020-12-25, whilst for the second, we collect  $\sim 1.4M$  comments from 2015-05-31 to 2020-12-25.

**YouTube** Data collection on YouTube is performed using the YouTube Data API. We collect videos that contain at least one search term from the following list of keywords related to football:  $\{SerieA, SerieATim, VAR, Napoli, ForzaNapoliSempre, RangersNapoli, Atalanta, GoAtalantaGo, ForzaAtalanta, Milan, ACMilan, SempreMilan, Udinese, ForzaUdinese, AlèUdin, Inter, IMInter, ForzaInter, ForzaLazio, LaLazio, SSLazio, CMonEagles, ASRoma, Juventus, JuventusFC, Juve, ForzaJuve, IlTorino, ForzaTorino, SFT, Salernitana, forzagranata, Fiorentina, forzaviola, ACFFiorentina, IlBologna, ForzaBologna, ForzaBFC, WeAreOne, IlSassuolo, ForzaSassuolo, ForzaSasol,$

*LEmpoli, ForzaEmpoli, EmpoliFC, EmpoliFootballChannel, HellasVerona, Hellas, DaiVerona, HVFC, LoSpezia, ForzaSpezia, SpeziaCalcio, ILecce, ForzaLecce, avantilecce, Cremonese, SolAmAi, ForzaGrigiorossi, DaiCrema, Sampdoria, FORZADORIA, Il Monza, Forza Monza, ACMonza, Monza, InsiemealMonza*}. Then, we retrieved all the comments for each video, resulting in a total of  $\sim 1M$  comments between 2022-08-02 and 2023-04-07. Consistently with the previously mentioned keywords search, we collect another dataset using only the keyword  $\{carbonara\}$  during a period ranging between 2018/01/05 and 2023/07/02, for a total of  $\sim 700K$  comments.

## 2 Supplementary Tables

**Table S1: User activity distributions show heavy-tailed behaviour.**

The table contains the mean  $\mu$ , standard deviation  $\sigma$ , skewness  $\gamma$ , kurtosis  $\beta$ , minimum  $m$ , maximum  $M$  and mean over maximum ratio values of the distributions shown in Fig.1. The very high values of  $\gamma$  and  $\beta$  suggest that a right heavy-tail is present in all the distributions. Moreover, the very low values of  $\frac{\mu}{M}$  provide further evidence for the long tail exhibited by all of them.

| Dataset                | $\mu$  | $\sigma$ | $\gamma$ | $\beta$    | $m$ | $M$   | $\frac{\mu}{M} \cdot 10^3$ |
|------------------------|--------|----------|----------|------------|-----|-------|----------------------------|
| Facebook Brexit        | 1.843  | 3.314    | 14.912   | 432.213    | 1   | 199   | 9.262                      |
| Facebook News          | 5.967  | 46.509   | 175.370  | 85363.523  | 1   | 40563 | 0.147                      |
| Facebook Vaccines      | 5.335  | 50.687   | 216.401  | 74222.282  | 1   | 20469 | 0.261                      |
| Gab Feed               | 87.761 | 711.604  | 25.168   | 1036.119   | 1   | 59397 | 1.478                      |
| Reddit Climate Change  | 2.664  | 7.281    | 40.011   | 3119.201   | 1   | 684   | 3.895                      |
| Reddit Conspiracy      | 8.388  | 98.832   | 255.494  | 72719.500  | 1   | 28318 | 0.296                      |
| Reddit News            | 3.546  | 9.883    | 16.811   | 539.386    | 1   | 647   | 5.481                      |
| Reddit Science         | 2.598  | 29.224   | 396.043  | 171147.901 | 1   | 12745 | 0.204                      |
| Reddit Vaccines        | 12.800 | 71.166   | 17.648   | 411.305    | 1   | 2318  | 5.522                      |
| Telegram Conspiracy    | 12.203 | 62.824   | 51.373   | 5462.725   | 1   | 9568  | 1.275                      |
| Telegram News          | 49.630 | 320.969  | 30.318   | 1394.893   | 1   | 18517 | 2.680                      |
| Telegram Politics      | 99.935 | 605.414  | 23.158   | 736.514    | 1   | 22651 | 4.412                      |
| Twitter Climate Change | 2.714  | 7.700    | 77.792   | 15857.718  | 1   | 2616  | 1.037                      |
| Twitter News           | 5.548  | 39.023   | 539.434  | 490973.585 | 1   | 37263 | 0.149                      |
| Twitter Vaccines       | 4.169  | 16.133   | 138.508  | 53969.078  | 1   | 10246 | 0.407                      |
| Usenet Conspiracy      | 5.548  | 50.099   | 80.142   | 9523.899   | 1   | 6662  | 0.833                      |
| Usenet News            | 7.752  | 86.858   | 160.344  | 32776.435  | 1   | 18107 | 0.428                      |
| Usenet Politics        | 11.221 | 88.391   | 71.253   | 8959.542   | 1   | 15632 | 0.718                      |
| Usenet Talk            | 11.573 | 97.128   | 50.215   | 4570.797   | 1   | 13724 | 0.843                      |
| Voat Conspiracy        | 37.076 | 301.851  | 37.342   | 2342.212   | 1   | 25706 | 1.442                      |
| Voat News              | 15.808 | 172.533  | 79.570   | 10437.417  | 1   | 28664 | 0.551                      |
| Voat Politics          | 16.318 | 172.781  | 71.644   | 7852.781   | 1   | 23632 | 0.691                      |
| YouTube Climate Change | 1.940  | 4.247    | 30.906   | 2314.805   | 1   | 625   | 3.104                      |
| YouTube News           | 4.764  | 36.292   | 296.198  | 255275.719 | 1   | 36900 | 0.129                      |
| YouTube Vaccines       | 2.936  | 13.012   | 102.905  | 25721.972  | 1   | 4797  | 0.612                      |

**Table S2: Thread length distributions show heavy-tailed behaviour.**

The table contains the mean  $\mu$ , standard deviation  $\sigma$ , skewness  $\gamma$ , kurtosis  $\beta$ , minimum  $m$ , maximum  $M$  and mean over maximum ratio values of the distributions shown in Fig.1a in ED. The very high values of  $\gamma$  and  $\beta$  suggest that a right heavy-tail is present in all the distributions. Moreover, the very low values of  $\frac{\mu}{M}$  provide further evidence for their long tail.

| Dataset                | $\mu$   | $\sigma$ | $\gamma$ | $\beta$    | $m$ | $M$    | $\frac{\mu}{M} \cdot 10^3$ |
|------------------------|---------|----------|----------|------------|-----|--------|----------------------------|
| Facebook Brexit        | 109.588 | 362.950  | 12.757   | 247.364    | 1   | 8986   | 12.195                     |
| Facebook News          | 52.581  | 360.100  | 95.318   | 20135.944  | 1   | 136406 | 0.385                      |
| Facebook Vaccines      | 13.485  | 36.459   | 34.907   | 2827.570   | 1   | 4003   | 3.369                      |
| Gab Feed               | 3.889   | 11.144   | 30.630   | 2550.265   | 1   | 2183   | 1.782                      |
| Reddit Climate Change  | 13.970  | 47.460   | 6.011    | 44.221     | 1   | 481    | 29.044                     |
| Reddit Conspiracy      | 22.153  | 48.062   | 5.449    | 38.573     | 1   | 481    | 46.056                     |
| Reddit News            | 49.959  | 98.397   | 2.487    | 8.132      | 1   | 445    | 112.268                    |
| Reddit Science         | 19.398  | 57.378   | 4.473    | 24.275     | 1   | 491    | 39.507                     |
| Reddit Vaccines        | 14.641  | 22.131   | 4.474    | 35.734     | 1   | 341    | 42.936                     |
| Telegram Conspiracy    | 56.257  | 103.770  | 23.173   | 1167.402   | 1   | 7580   | 7.422                      |
| Telegram News          | 29.328  | 55.120   | 5.473    | 54.222     | 1   | 1383   | 21.206                     |
| Telegram Politics      | 22.084  | 41.439   | 10.556   | 225.954    | 1   | 1534   | 14.396                     |
| Twitter Climate Change | 74.613  | 1068.886 | 119.338  | 22036.559  | 1   | 232837 | 0.320                      |
| Twitter News           | 97.013  | 493.960  | 52.815   | 5130.872   | 1   | 69417  | 1.398                      |
| Twitter Vaccines       | 393.399 | 2638.999 | 44.737   | 3567.687   | 1   | 329653 | 1.193                      |
| Usenet Conspiracy      | 4.393   | 12.474   | 28.288   | 1848.763   | 1   | 1132   | 3.881                      |
| Usenet News            | 5.829   | 17.918   | 22.216   | 959.125    | 1   | 1244   | 4.685                      |
| Usenet Politics        | 6.056   | 37.024   | 299.079  | 129004.274 | 1   | 16309  | 0.371                      |
| Usenet Talk            | 5.593   | 17.698   | 17.901   | 592.392    | 1   | 1095   | 5.108                      |
| Voat Conspiracy        | 10.253  | 14.142   | 4.949    | 70.838     | 1   | 636    | 16.121                     |
| Voat News              | 8.185   | 13.985   | 5.329    | 55.630     | 1   | 386    | 21.204                     |
| Voat Politics          | 7.574   | 13.208   | 5.399    | 53.931     | 1   | 358    | 21.158                     |
| Youtube Climate Change | 93.804  | 737.191  | 37.626   | 1791.166   | 1   | 38793  | 2.418                      |
| Youtube News           | 190.361 | 945.639  | 82.539   | 13161.303  | 1   | 178889 | 1.064                      |
| Youtube Vaccines       | 187.242 | 610.426  | 18.179   | 755.517    | 1   | 34106  | 5.490                      |

**Table S3: User lifetime distributions show heavy-tailed behaviour.**

The table contains the mean  $\mu$ , standard deviation  $\sigma$ , skewness  $\gamma$ , kurtosis  $\beta$ , minimum  $m$ , maximum  $M$  and mean over maximum ratio values of the distributions shown in Fig.1b in ED. The very high values of  $\gamma$  and  $\beta$  suggest that a right heavy-tail is present in all the distributions. Moreover, the very low values of  $\frac{\mu}{M}$  provide further evidence for their long tail.

| Dataset                | $\mu$   | $\sigma$ | $\gamma$ | $\beta$ | $m$ | $M$  | $\frac{\mu}{M} \cdot 10^3$ |
|------------------------|---------|----------|----------|---------|-----|------|----------------------------|
| Facebook Brexit        | 8.458   | 27.446   | 3.974    | 19.077  | 0   | 205  | 41.259                     |
| Facebook News          | 150.865 | 312.934  | 2.865    | 12.296  | 0   | 2379 | 63.415                     |
| Facebook Vaccines      | 187.382 | 396.198  | 2.797    | 11.636  | 0   | 2706 | 69.247                     |
| Gab Feed               | 94.241  | 174.820  | 2.171    | 6.929   | 0   | 805  | 117.069                    |
| Reddit Climate Change  | 55.493  | 238.965  | 5.260    | 30.318  | 0   | 1804 | 30.761                     |
| Reddit Conspiracy      | 109.709 | 277.915  | 3.487    | 14.948  | 0   | 1671 | 65.655                     |
| Reddit News            | 44.965  | 93.334   | 2.220    | 6.762   | 0   | 364  | 123.530                    |
| Reddit Science         | 140.262 | 326.552  | 2.538    | 8.476   | 0   | 1802 | 77.837                     |
| Reddit Vaccines        | 44.802  | 126.924  | 4.490    | 29.140  | 0   | 1583 | 28.302                     |
| Telegram Conspiracy    | 92.997  | 165.000  | 2.131    | 6.960   | 0   | 1204 | 77.240                     |
| Telegram News          | 111.731 | 174.069  | 2.151    | 9.394   | 0   | 1688 | 66.191                     |
| Telegram Politics      | 233.781 | 281.810  | 1.479    | 6.410   | 0   | 1962 | 119.154                    |
| Twitter Climate Change | 19.747  | 75.233   | 5.500    | 33.594  | 0   | 996  | 19.827                     |
| Twitter News           | 110.800 | 197.114  | 1.877    | 5.544   | 0   | 1054 | 105.123                    |
| Twitter Vaccines       | 50.042  | 120.911  | 6.688    | 84.010  | 0   | 3437 | 14.560                     |
| Usenet Conspiracy      | 39.449  | 157.473  | 7.797    | 88.666  | 0   | 3532 | 11.169                     |
| Usenet News            | 53.808  | 186.146  | 6.714    | 69.470  | 0   | 4137 | 13.006                     |
| Usenet Politics        | 65.119  | 210.660  | 6.048    | 54.987  | 0   | 4704 | 13.843                     |
| Usenet Talk            | 69.355  | 227.014  | 6.110    | 55.339  | 0   | 4270 | 16.242                     |
| Voat Conspiracy        | 113.371 | 231.480  | 2.143    | 6.501   | 0   | 1081 | 104.876                    |
| Voat News              | 87.741  | 287.198  | 4.306    | 22.930  | 0   | 2373 | 36.975                     |
| Voat Politics          | 98.507  | 297.648  | 3.938    | 19.564  | 0   | 2371 | 41.547                     |
| Youtube Climate Change | 33.279  | 175.596  | 7.720    | 73.824  | 0   | 2603 | 12.785                     |
| Youtube News           | 224.278 | 535.427  | 3.640    | 19.731  | 0   | 5595 | 40.085                     |
| Youtube Vaccines       | 28.551  | 69.920   | 3.127    | 13.809  | 0   | 603  | 47.348                     |

**Table S4: Thread lifetime distributions show heavy-tailed behaviour.**

The table contains the mean  $\mu$ , standard deviation  $\sigma$ , skewness  $\gamma$ , kurtosis  $\beta$ , minimum  $m$ , maximum  $M$  and mean over maximum ratio values of the distributions shown in Fig.1c in ED. The very high values of  $\gamma$  and  $\beta$  suggest that a right heavy-tail is present in all the distributions. Moreover, the very low values of  $\frac{\mu}{M}$  provide further evidence for their long tail.

| Dataset                | $\mu$   | $\sigma$ | $\gamma$ | $\beta$   | $m$ | $M$  | $\frac{\mu}{M} \cdot 10^3$ |
|------------------------|---------|----------|----------|-----------|-----|------|----------------------------|
| Facebook Brexit        | 4.028   | 13.898   | 6.216    | 47.714    | 0   | 167  | 24.119                     |
| Facebook News          | 10.018  | 75.216   | 12.640   | 209.703   | 0   | 2400 | 4.174                      |
| Facebook Vaccines      | 12.656  | 94.661   | 12.575   | 196.556   | 0   | 2481 | 5.101                      |
| Gab Feed               | 1.329   | 15.381   | 22.043   | 627.516   | 0   | 791  | 1.680                      |
| Reddit Climate Change  | 1.373   | 19.584   | 57.393   | 3746.499  | 0   | 1293 | 1.062                      |
| Reddit Conspiracy      | 6.863   | 79.606   | 17.290   | 313.775   | 0   | 1744 | 3.935                      |
| Reddit News            | 1.379   | 6.775    | 12.223   | 190.254   | 0   | 149  | 9.254                      |
| Reddit Science         | 1.564   | 9.932    | 11.333   | 151.991   | 0   | 179  | 8.736                      |
| Reddit Vaccines        | 7.744   | 44.243   | 13.267   | 225.489   | 0   | 991  | 7.814                      |
| Telegram Conspiracy    | 14.553  | 45.247   | 7.566    | 76.725    | 0   | 737  | 19.746                     |
| Telegram News          | 2.471   | 38.157   | 23.953   | 692.321   | 0   | 1417 | 1.744                      |
| Telegram Politics      | 2.351   | 21.116   | 21.942   | 675.352   | 0   | 881  | 2.669                      |
| Twitter Climate Change | 10.610  | 65.619   | 8.703    | 87.204    | 0   | 1030 | 10.301                     |
| Twitter News           | 7.501   | 47.665   | 11.643   | 159.696   | 0   | 1034 | 7.254                      |
| Twitter Vaccines       | 53.967  | 165.962  | 4.629    | 39.334    | 0   | 4382 | 12.316                     |
| Usenet Conspiracy      | 4.698   | 28.200   | 41.912   | 3388.995  | 0   | 2831 | 1.660                      |
| Usenet News            | 2.978   | 21.940   | 73.221   | 8983.108  | 0   | 3419 | 0.871                      |
| Usenet Politics        | 3.289   | 21.696   | 51.650   | 5004.203  | 0   | 3283 | 1.002                      |
| Usenet Talk            | 3.546   | 23.748   | 59.778   | 6438.581  | 0   | 3924 | 0.904                      |
| Voat Conspiracy        | 0.877   | 6.815    | 44.525   | 5847.673  | 0   | 1057 | 0.829                      |
| Voat News              | 0.491   | 7.031    | 171.089  | 48056.295 | 0   | 2110 | 0.233                      |
| Voat Politics          | 0.440   | 6.978    | 174.368  | 47319.457 | 0   | 1998 | 0.220                      |
| Youtube Climate Change | 121.841 | 350.261  | 4.040    | 20.166    | 0   | 2659 | 45.822                     |
| Youtube News           | 508.682 | 807.791  | 2.004    | 6.983     | 0   | 5820 | 87.402                     |
| Youtube Vaccines       | 50.954  | 74.673   | 2.361    | 10.631    | 0   | 607  | 83.944                     |

**Table S5: The majority of users wrote at least one toxic comment.**  
 For each dataset, the table contains the fraction  $f$  of users (having at least 11 comments) who posted at least one toxic comment.

| Dataset                | $f$  |
|------------------------|------|
| YouTube Climate Change | 0.48 |
| YouTube News           | 0.71 |
| YouTube Vaccines       | 0.43 |
| Twitter Climate Change | 0.51 |
| Twitter News           | 0.62 |
| Twitter Vaccines       | 0.59 |
| Telegram Conspiracy    | 0.77 |
| Telegram News          | 0.47 |
| Telegram Politics      | 0.70 |
| Reddit Climate Change  | 0.51 |
| Reddit Conspiracy      | 0.70 |
| Reddit News            | 0.71 |
| Reddit Science         | 0.20 |
| Reddit Vaccines        | 0.53 |
| Facebook Brexit        | 0.59 |
| Facebook Vaccines      | 0.53 |
| Facebook News          | 0.58 |
| Gab Feed               | 0.80 |
| Usenet Conspiracy      | 0.53 |
| Usenet News            | 0.63 |
| Usenet Politics        | 0.66 |
| Usenet Talk            | 0.51 |
| Voat Conspiracy        | 0.85 |
| Voat News              | 0.90 |
| Voat Politics          | 0.91 |



**Table S6: Validation dataset breakdown.** TP, TD and TI indicate, respectively, the percentage of toxic comments in a dataset labelled by Perspective, Detoxify and IMSYPP.

| Dataset           | Time range              | Comments | Threads | Users   | TP   | TD   | TI   |
|-------------------|-------------------------|----------|---------|---------|------|------|------|
| Facebook Film     | 2015-01-01 - 2017-08-10 | 493825   | 13385   | 305415  | 0.03 | 0.09 | 0.13 |
| Facebook Sports   | 2015-01-01 - 2017-08-19 | 494275   | 19632   | 271575  | 0.04 | 0.11 | 0.18 |
| Reddit AskReddit  | 2021-02-01 - 2021-02-15 | 2380486  | 156168  | 492891  | 0.07 | 0.11 | 0.16 |
| Reddit IAmA       | 2021-02-01 - 2022-12-31 | 501507   | 13027   | 194197  | 0.03 | 0.06 | 0.12 |
| Reddit Movies     | 2021-02-01 - 2023-01-01 | 11597305 | 159976  | 1263209 | 0.05 | 0.10 | 0.18 |
| Telegram Crypto   | 2021-08-13 - 2023-06-22 | 147610   | 4551    | 19372   | 0.05 | 0.09 | 0.20 |
| Twitter Got       | 2019-01-01 - 2022-12-24 | 442709   | 62488   | 222514  | 0.02 | 0.04 | 0.05 |
| Twitter NASA      | 2019-01-01 - 2022-12-29 | 346157   | 22906   | 187061  | 0.02 | 0.03 | 0.06 |
| Voat Askvoat      | 2014-06-19 - 2020-12-25 | 612668   | 50389   | 55242   | 0.12 | 0.19 | 0.28 |
| Voat Whatever     | 2015-05-31 - 2020-12-25 | 1366671  | 177278  | 76905   | 0.20 | 0.27 | 0.40 |
| Youtube Carbonara | 2018-01-05 - 2023-07-02 | 699670   | 3615    | 545174  | 0.03 | 0.04 | 0.04 |
| Youtube Football  | 2022-08-02 - 2023-04-07 | 948918   | 16887   | 165706  | 0.02 | 0.08 | 0.13 |

**Table S7: Dataset subsets for the analysis of participation and toxicity along threads.** For each dataset, it is reported the number of conversations, along with their minimum and maximum size, which correspond to the 0.7 and 1 values of the normalized log-binning.

| Dataset                | Threads | Min. size | Max. size |
|------------------------|---------|-----------|-----------|
| Facebook Brexit        | 711     | 140       | 8986      |
| Facebook News          | 25488   | 1424      | 136406    |
| Facebook Vaccines      | 3959    | 81        | 4003      |
| Gab Feed               | 5931    | 104       | 2183      |
| Reddit Climate Change  | 325     | 51        | 481       |
| Reddit Conspiracy      | 2499    | 62        | 481       |
| Reddit News            | 1529    | 58        | 445       |
| Reddit Science         | 2058    | 63        | 491       |
| Reddit Vaccines        | 730     | 26        | 341       |
| Telegram Conspiracy    | 3814    | 115       | 7580      |
| Telegram News          | 2723    | 77        | 1383      |
| Telegram Politics      | 1817    | 62        | 1534      |
| Twitter Climate Change | 2076    | 836       | 232837    |
| Twitter News           | 3382    | 474       | 69417     |
| Twitter Vaccines       | 5681    | 1904      | 329653    |
| Usenet Conspiracy      | 798     | 31        | 1132      |
| Usenet News            | 1165    | 50        | 1244      |
| Usenet Politics        | 1824    | 87        | 16309     |
| Usenet Talk            | 2472    | 74        | 1095      |
| Voat Conspiracy        | 5619    | 34        | 636       |
| Voat News              | 6064    | 40        | 386       |
| Voat Politics          | 5134    | 37        | 358       |
| YouTube Climate Change | 800     | 182       | 38793     |
| YouTube News           | 6244    | 732       | 178889    |
| YouTube Vaccines       | 1717    | 321       | 34106     |



**Table S10: Validation dataset subsets for the analysis of participation and toxicity along threads.** For each dataset, it is reported the number of conversations, along with their minimum and maximum size, which correspond to the 0.7 and 1 values of the normalized log-binning.

| Dataset           | Threads | Min. size | Max. size |
|-------------------|---------|-----------|-----------|
| Facebook Film     | 919     | 114       | 7894      |
| Facebook Sports   | 1083    | 91        | 10689     |
| Reddit Askreddit  | 365     | 395       | 33506     |
| Reddit Iama       | 562     | 175       | 12275     |
| Reddit Movies     | 1937    | 920       | 90977     |
| Telegram Crypto   | 1255    | 40        | 574       |
| Twitter Got       | 567     | 81        | 20264     |
| Twitter Nasa      | 611     | 89        | 6481      |
| Voat Askvoat      | 3072    | 37        | 429       |
| Voat Whatever     | 6233    | 37        | 387       |
| Youtube Carbonara | 694     | 199       | 20249     |
| Youtube Football  | 2283    | 115       | 2024      |

**Table S11: No difference in participation trends in toxic and non-toxic conversations for the validation dataset.** For each validation dataset and classifier, we report the  $p$ -value associated with the interaction effect between toxic and non-toxic threads in the participation regression.

| Dataset           | Perspective | Detoxify | Imsypp |
|-------------------|-------------|----------|--------|
| Facebook Film     | 0.705       | 0.437    | 0.461  |
| Facebook Sports   | 0.870       | 0.731    | 0.456  |
| Reddit Askreddit  | 0.218       | 0.679    | 0.283  |
| Reddit Iama       | 0.987       | 0.543    | 0.475  |
| Reddit Movies     | 0.248       | 0.161    | 0.167  |
| Telegram Crypto   | 0.493       | 0.627    | 0.890  |
| Twitter Got       | 0.052       | 0.673    | 0.736  |
| Twitter Nasa      | 0.002       | 0.004    | 0.001  |
| Voat Askvoat      | 0.193       | 0.298    | 0.086  |
| Voat Whatever     | 0.288       | 0.300    | 0.196  |
| YouTube Carbonara | 0.648       | 0.621    | 0.360  |
| YouTube Football  | 0.100       | 0.254    | 0.564  |

**Table S12: Toxicity does not tend to increase with user engagement.** Burst analysis of activity in conversations (see ED tab. 4) for the validation dataset, using the three toxicity detectors.

| Dataset           | N. of Threads | Peak >Pre | Peak >Post | Post >Pre | Detector    |
|-------------------|---------------|-----------|------------|-----------|-------------|
| Reddit Askreddit  | 17879         | 0.000     | 0.000      | 0.000     | Perspective |
| Reddit Iama       | 1403          | 0.000     | 1.000      | 0.000     | Perspective |
| Reddit Movies     | 5000          | 0.000     | 0.000      | 0.000     | Perspective |
| Voat Askvoat      | 8597          | 0.000     | 0.000      | 0.002     | Perspective |
| Voat Whatever     | 16537         | 0.000     | 0.000      | 0.000     | Perspective |
| Telegram Crypto   | 2167          | 0.000     | 0.043      | 0.000     | Perspective |
| Telegram Got      | 2912          | 0.000     | 0.032      | 0.000     | Perspective |
| Telegram Nasa     | 2580          | 0.000     | 1.000      | 0.000     | Perspective |
| Facebook Film     | 3990          | 0.000     | 0.860      | 0.000     | Perspective |
| Facebook Sports   | 4588          | 0.000     | 0.147      | 0.000     | Perspective |
| YouTube Carbonara | 1864          | 0.000     | 1.000      | 0.000     | Perspective |
| YouTube Football  | 6824          | 0.000     | 0.002      | 0.000     | Perspective |
| Reddit Askreddit  | 17879         | 0.000     | 0.000      | 0.000     | Detoxify    |
| Reddit Iama       | 1403          | 0.000     | 1.000      | 0.000     | Detoxify    |
| Reddit Movies     | 5000          | 0.000     | 0.000      | 0.000     | Detoxify    |
| Voat Askvoat      | 8597          | 0.000     | 0.005      | 0.049     | Detoxify    |
| Voat Whatever     | 16537         | 0.000     | 0.022      | 0.000     | Detoxify    |
| Telegram Crypto   | 2167          | 0.000     | 0.004      | 0.000     | Detoxify    |
| Twitter Got       | 2912          | 0.000     | 0.117      | 0.000     | Detoxify    |
| Twitter Nasa      | 2580          | 0.000     | 1.000      | 0.000     | Detoxify    |
| Facebook Film     | 3990          | 0.000     | 0.896      | 0.000     | Detoxify    |
| Facebook Sports   | 4588          | 0.000     | 0.267      | 0.000     | Detoxify    |
| YouTube Carbonara | 1864          | 0.000     | 0.713      | 0.000     | Detoxify    |
| YouTube Football  | 6824          | 0.000     | 0.000      | 0.000     | Detoxify    |
| Reddit Askreddit  | 17879         | 0.000     | 0.012      | 0.000     | IMSYPP      |
| Reddit Iama       | 1403          | 0.000     | 1.000      | 0.000     | IMSYPP      |
| Reddit Movies     | 5000          | 0.025     | 0.471      | 0.590     | IMSYPP      |
| Voat Askvoat      | 8597          | 0.004     | 0.488      | 0.110     | IMSYPP      |
| Voat Whatever     | 16537         | 0.002     | 0.764      | 0.019     | IMSYPP      |
| Telegram Crypto   | 2167          | 0.000     | 0.003      | 0.000     | IMSYPP      |
| Twitter Got       | 2912          | 0.000     | 0.331      | 0.000     | IMSYPP      |
| Twitter Nasa      | 2580          | 0.000     | 0.772      | 0.000     | IMSYPP      |
| Facebook Film     | 3990          | 0.000     | 1.000      | 0.000     | IMSYPP      |
| Facebook Sports   | 4588          | 0.000     | 1.000      | 0.000     | IMSYPP      |
| YouTube Carbonara | 1864          | 0.000     | 1.000      | 0.000     | IMSYPP      |
| YouTube Football  | 6824          | 0.000     | 0.020      | 0.000     | IMSYPP      |

**Table S13: Validation dataset: toxicity increases with conversation length.** Results of Mann-Kendall test on the toxicity trends  $T_o$  and slope from linear regression  $\beta_0$  of the validation dataset for Perspective Detoxify and IMSYPP.

| Dataset           | Perspective |                              |         | Detoxify |                              |         | IMSYPP |                              |         |
|-------------------|-------------|------------------------------|---------|----------|------------------------------|---------|--------|------------------------------|---------|
|                   | $T_o$       | $\beta_0$<br>$\cdot 10^{-3}$ | $p$     | $T_o$    | $\beta_0$<br>$\cdot 10^{-3}$ | $p$     | $T_o$  | $\beta_0$<br>$\cdot 10^{-3}$ | $p$     |
| Facebook Film     | ↑           | 26.514                       | < 0.001 | ↑        | 43.801                       | < 0.001 | ↑      | 76.734                       | < 0.001 |
| Facebook Sports   | ↑           | 43.609                       | < 0.001 | ↑        | 79.326                       | < 0.001 | ↑      | 145.053                      | < 0.001 |
| Reddit Askreddit  | ↑           | 19.875                       | 0.021   | ↑        | 40.909                       | 0.003   | ↑      | 71.521                       | < 0.001 |
| Reddit Iama       | ↑           | 22.880                       | < 0.001 | ↑        | 50.688                       | < 0.001 | ↑      | 111.957                      | < 0.001 |
| Reddit Movies     | ↑           | 20.437                       | 0.027   | ↑        | 43.326                       | < 0.001 | ↑      | 81.102                       | < 0.001 |
| Telegram Crypto   | ↑           | 29.474                       | < 0.001 | ↑        | 33.382                       | < 0.001 | ↑      | 107.940                      | < 0.001 |
| Twitter Got       | ↑           | 15.237                       | 0.010   | ↑        | 25.348                       | < 0.001 | ↑      | 43.010                       | < 0.001 |
| Twitter Nasa      | ↑           | 16.949                       | < 0.001 | ↑        | 29.947                       | < 0.001 | ↑      | 54.803                       | < 0.001 |
| Voat Askvoat      | ↑           | 38.608                       | 0.001   | ↑        | 56.176                       | < 0.001 | ↑      | 83.373                       | < 0.001 |
| Voat Whatever     | ↑           | 68.315                       | < 0.001 | ↑        | 89.382                       | < 0.001 | ↑      | 108.309                      | < 0.001 |
| Youtube Carbonara | ↑           | 11.882                       | < 0.001 | ↑        | 24.988                       | < 0.001 | ↑      | 22.925                       | < 0.001 |
| Youtube Football  | ↑           | 11.946                       | < 0.001 | ↑        | 39.510                       | < 0.001 | ↑      | 76.700                       | < 0.001 |

**Table S14: Agreement table between the classification given by Perspective API, and those of Detoxify and IMSYPP. Classification labels abbreviations: NT: non-toxic; T: toxic. Numbers represent percentages.**

| Dataset           | Perspective | Detoxify |       | IMSYPP |       |
|-------------------|-------------|----------|-------|--------|-------|
|                   |             | NT       | T     | NT     | T     |
| Facebook Film     | NT          | 94.00    | 6.00  | 89.27  | 10.73 |
|                   | T           | 20.99    | 79.01 | 9.74   | 90.26 |
| Facebook Sports   | NT          | 92.53    | 7.47  | 85.13  | 14.87 |
|                   | T           | 19.33    | 80.67 | 6.31   | 93.69 |
| Reddit Askreddit  | NT          | 94.58    | 5.42  | 88.75  | 11.25 |
|                   | T           | 4.68     | 95.32 | 14.35  | 85.65 |
| Reddit Iama       | NT          | 96.61    | 3.39  | 90.18  | 9.82  |
|                   | T           | 3.11     | 96.89 | 10.43  | 89.57 |
| Reddit Movies     | NT          | 94.76    | 5.24  | 85.74  | 14.26 |
|                   | T           | 4.44     | 95.56 | 7.51   | 92.49 |
| Telegram Crypto   | NT          | 95.95    | 4.05  | 83.62  | 16.38 |
|                   | T           | 8.35     | 91.65 | 9.38   | 90.62 |
| Twitter Got       | NT          | 97.61    | 2.39  | 96.28  | 3.72  |
|                   | T           | 25.76    | 74.24 | 40.41  | 59.59 |
| Twitter Nasa      | NT          | 98.42    | 1.58  | 94.75  | 5.25  |
|                   | T           | 21.71    | 78.29 | 30.71  | 69.29 |
| Voat Askvoat      | NT          | 92.26    | 7.74  | 80.52  | 19.48 |
|                   | T           | 2.48     | 97.52 | 8.71   | 91.29 |
| Voat Whatever     | NT          | 90.33    | 9.67  | 72.56  | 27.44 |
|                   | T           | 2.63     | 97.37 | 7.17   | 92.83 |
| Youtube Carbonara | NT          | 97.26    | 2.74  | 97.54  | 2.46  |
|                   | T           | 46.12    | 53.88 | 57.98  | 42.02 |
| Youtube Football  | NT          | 94.05    | 5.95  | 89.09  | 10.91 |
|                   | T           | 17.29    | 82.71 | 8.11   | 91.89 |

**Table S15: Summary characteristics of Box-Plot shown in Fig. S3.** The table contains the sample size  $n$  (the number of conversations composed of 6 – 20 comments), the lower whisker value  $l$ , the 25% percentile  $Q_1$ , the median  $Q_2$ , the 75% percentile  $Q_3$ , the upper whisker value  $u$ , the minimum  $m$  and maximum  $M$  value of each distribution.

| Dataset                | Type of comment | $n$     | $l$   | $Q_1$ | $Q_2$ | $Q_3$ | $u$   | $m$   | $M$   |
|------------------------|-----------------|---------|-------|-------|-------|-------|-------|-------|-------|
| Facebook Brexit        | Begin           | 3234    | 0.000 | 0.032 | 0.100 | 0.239 | 0.544 | 0.000 | 0.939 |
| Facebook Brexit        | End             | 3234    | 0.000 | 0.038 | 0.113 | 0.271 | 0.618 | 0.000 | 0.962 |
| Facebook News          | Begin           | 74100   | 0.000 | 0.021 | 0.053 | 0.174 | 0.403 | 0.000 | 1.000 |
| Facebook News          | End             | 74100   | 0.000 | 0.022 | 0.062 | 0.199 | 0.463 | 0.000 | 0.988 |
| Facebook Vaccines      | Begin           | 128046  | 0.000 | 0.022 | 0.058 | 0.165 | 0.380 | 0.000 | 0.986 |
| Facebook Vaccines      | End             | 128046  | 0.000 | 0.022 | 0.065 | 0.173 | 0.399 | 0.000 | 0.988 |
| Gab Feed               | Begin           | 1342839 | 0.000 | 0.030 | 0.117 | 0.397 | 0.947 | 0.000 | 1.000 |
| Gab Feed               | End             | 1342839 | 0.000 | 0.027 | 0.111 | 0.378 | 0.903 | 0.000 | 1.000 |
| Reddit Climate Change  | Begin           | 1887    | 0.000 | 0.017 | 0.038 | 0.155 | 0.361 | 0.000 | 0.975 |
| Reddit Climate Change  | End             | 1887    | 0.000 | 0.017 | 0.039 | 0.119 | 0.270 | 0.000 | 0.950 |
| Reddit Conspiracy      | Begin           | 39711   | 0.000 | 0.025 | 0.052 | 0.125 | 0.275 | 0.000 | 0.988 |
| Reddit Conspiracy      | End             | 39711   | 0.000 | 0.023 | 0.054 | 0.203 | 0.473 | 0.000 | 0.982 |
| Reddit News            | Begin           | 5358    | 0.000 | 0.026 | 0.084 | 0.285 | 0.674 | 0.000 | 0.975 |
| Reddit News            | End             | 5358    | 0.000 | 0.025 | 0.083 | 0.285 | 0.674 | 0.000 | 0.961 |
| Reddit Science         | Begin           | 13758   | 0.000 | 0.020 | 0.027 | 0.075 | 0.159 | 0.000 | 0.950 |
| Reddit Science         | End             | 13758   | 0.000 | 0.018 | 0.033 | 0.094 | 0.206 | 0.000 | 0.911 |
| Reddit Vaccines        | Begin           | 4860    | 0.000 | 0.022 | 0.046 | 0.154 | 0.352 | 0.000 | 0.964 |
| Reddit Vaccines        | End             | 4860    | 0.000 | 0.022 | 0.050 | 0.158 | 0.361 | 0.000 | 0.975 |
| Telegram Conspiracy    | Begin           | 22239   | 0.000 | 0.018 | 0.053 | 0.243 | 0.578 | 0.000 | 0.982 |
| Telegram Conspiracy    | End             | 22239   | 0.000 | 0.018 | 0.054 | 0.285 | 0.686 | 0.000 | 0.982 |
| Telegram News          | Begin           | 23028   | 0.000 | 0.009 | 0.021 | 0.056 | 0.125 | 0.000 | 0.950 |
| Telegram News          | End             | 23028   | 0.000 | 0.007 | 0.019 | 0.067 | 0.155 | 0.000 | 0.964 |
| Telegram Politics      | Begin           | 33366   | 0.000 | 0.011 | 0.031 | 0.137 | 0.327 | 0.000 | 0.975 |
| Telegram Politics      | End             | 33366   | 0.000 | 0.009 | 0.029 | 0.137 | 0.330 | 0.000 | 0.975 |
| Twitter Climate Change | Begin           | 59676   | 0.000 | 0.010 | 0.026 | 0.103 | 0.241 | 0.000 | 0.996 |
| Twitter Climate Change | End             | 59676   | 0.000 | 0.010 | 0.027 | 0.110 | 0.260 | 0.000 | 0.986 |
| Twitter News           | Begin           | 52992   | 0.000 | 0.015 | 0.044 | 0.189 | 0.451 | 0.000 | 0.961 |
| Twitter News           | End             | 52992   | 0.000 | 0.016 | 0.051 | 0.224 | 0.536 | 0.000 | 0.965 |
| Twitter Vaccines       | Begin           | 74898   | 0.000 | 0.013 | 0.035 | 0.115 | 0.268 | 0.000 | 0.988 |
| Twitter Vaccines       | End             | 74898   | 0.000 | 0.013 | 0.034 | 0.114 | 0.267 | 0.000 | 1.000 |
| Usenet Conspiracy      | Begin           | 21708   | 0.000 | 0.049 | 0.119 | 0.289 | 0.644 | 0.000 | 0.982 |
| Usenet Conspiracy      | End             | 21708   | 0.000 | 0.046 | 0.119 | 0.305 | 0.687 | 0.000 | 0.982 |
| Usenet News            | Begin           | 45369   | 0.000 | 0.089 | 0.203 | 0.397 | 0.859 | 0.000 | 0.988 |
| Usenet News            | End             | 45369   | 0.000 | 0.075 | 0.202 | 0.398 | 0.878 | 0.000 | 0.988 |
| Usenet Politics        | Begin           | 173109  | 0.000 | 0.094 | 0.214 | 0.398 | 0.854 | 0.000 | 0.988 |
| Usenet Politics        | End             | 173109  | 0.000 | 0.081 | 0.204 | 0.399 | 0.870 | 0.000 | 0.988 |
| Usenet Talk            | Begin           | 121653  | 0.000 | 0.056 | 0.146 | 0.315 | 0.699 | 0.000 | 0.988 |
| Usenet Talk            | End             | 121653  | 0.000 | 0.053 | 0.141 | 0.323 | 0.726 | 0.000 | 0.989 |
| Voat Conspiracy        | Begin           | 112224  | 0.000 | 0.026 | 0.090 | 0.290 | 0.686 | 0.000 | 0.994 |
| Voat Conspiracy        | End             | 112224  | 0.000 | 0.024 | 0.083 | 0.305 | 0.725 | 0.000 | 0.988 |
| Voat News              | Begin           | 130953  | 0.000 | 0.039 | 0.180 | 0.470 | 0.989 | 0.000 | 0.989 |
| Voat News              | End             | 130953  | 0.000 | 0.037 | 0.184 | 0.479 | 0.989 | 0.000 | 0.989 |
| Voat Politics          | Begin           | 103344  | 0.000 | 0.039 | 0.177 | 0.462 | 0.994 | 0.000 | 0.994 |
| Voat Politics          | End             | 103344  | 0.000 | 0.039 | 0.192 | 0.479 | 0.988 | 0.000 | 0.988 |
| Youtube Climate Change | Begin           | 5442    | 0.000 | 0.022 | 0.087 | 0.271 | 0.643 | 0.000 | 0.986 |
| Youtube Climate Change | End             | 5442    | 0.000 | 0.024 | 0.103 | 0.277 | 0.656 | 0.000 | 0.985 |
| Youtube News           | Begin           | 66531   | 0.000 | 0.027 | 0.089 | 0.259 | 0.603 | 0.000 | 0.991 |
| Youtube News           | End             | 66531   | 0.000 | 0.029 | 0.098 | 0.275 | 0.643 | 0.000 | 0.991 |
| Youtube Vaccines       | Begin           | 9867    | 0.000 | 0.015 | 0.043 | 0.149 | 0.350 | 0.000 | 0.986 |
| Youtube Vaccines       | End             | 9867    | 0.000 | 0.016 | 0.050 | 0.164 | 0.386 | 0.000 | 0.986 |



**Table S16: Summary characteristics of Box-Plot shown in Fig. S2.** The table contains the sample size  $n$ , the lower whisker value  $l$ , the 25% percentile  $Q_1$ , the median  $Q_2$ , the 75% percentile  $Q_3$ , the upper whisker value  $u$ , the minimum  $m$  and maximum  $M$  value of each distribution.

| Classifier  | Type          | $n$ | $l$    | $Q_1$  | $Q_2$  | $Q_3$  | $u$    | $m$    | $M$    |
|-------------|---------------|-----|--------|--------|--------|--------|--------|--------|--------|
| Detoxify    | Toxicity      | 12  | -0.002 | 0.003  | 0.009  | 0.010  | 0.011  | -0.002 | 0.037  |
| Detoxify    | Participation | 12  | -0.107 | -0.056 | -0.030 | -0.017 | -0.009 | -0.134 | -0.009 |
| Imsypp      | Toxicity      | 12  | -0.001 | 0.005  | 0.010  | 0.016  | 0.023  | -0.038 | 0.072  |
| Imsypp      | Participation | 12  | -0.107 | -0.056 | -0.030 | -0.017 | -0.009 | -0.134 | -0.009 |
| Perspective | Toxicity      | 12  | 0.000  | 0.004  | 0.006  | 0.008  | 0.008  | -0.004 | 0.021  |
| Perspective | Participation | 12  | -0.107 | -0.056 | -0.030 | -0.017 | -0.009 | -0.134 | -0.009 |

### 3 Supplementary Figures

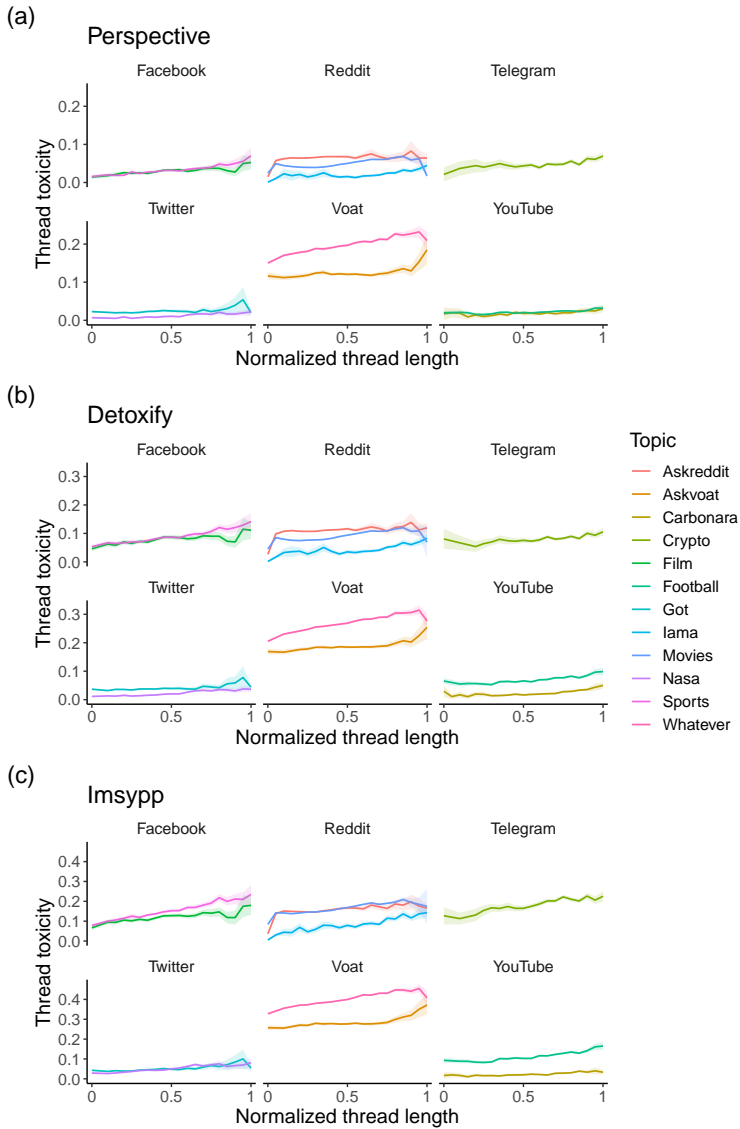

**Fig. S1: Validation dataset: toxicity increases with conversation size.** Mean fraction of toxic comments in conversations versus conversation size (see Fig. 1), using Perspective API **a**), Detoxify **b**) and IMSYPP **c**). The sample sizes and the results of the relative Mann-Kendall tests are shown in Tab. S13. Trends are reported with their 95% confidence interval.

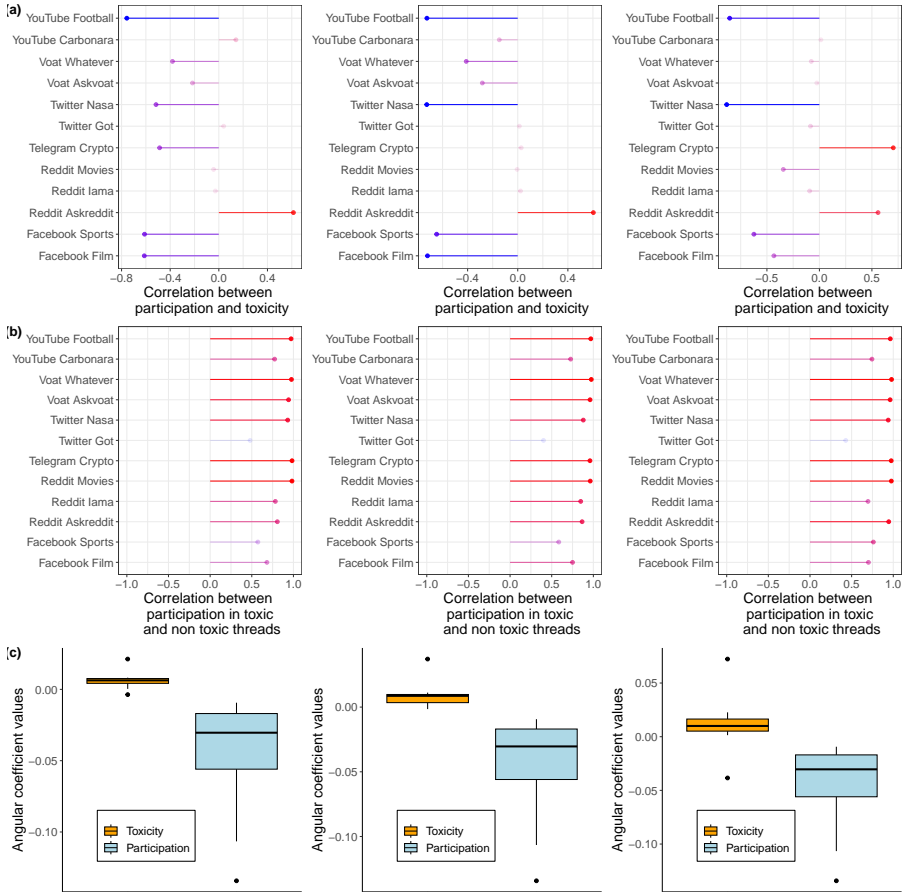

**Fig. S2: Participation analysis for the validation dataset.** (From left to right, results obtained with: Perspective API, Detoxify, IMSYPP) **a.** Pearson's correlation coefficients between user participation and toxicity trends for each dataset. **b.** Pearson's correlation coefficients between users' participation in toxic and non-toxic thread sets, for each dataset. **c.** Boxplots of the distribution of toxicity and participation trend slopes ( $N=12$ ), as resulting from linear regression. The summary characteristics of each box plot are shown in Tab. S16

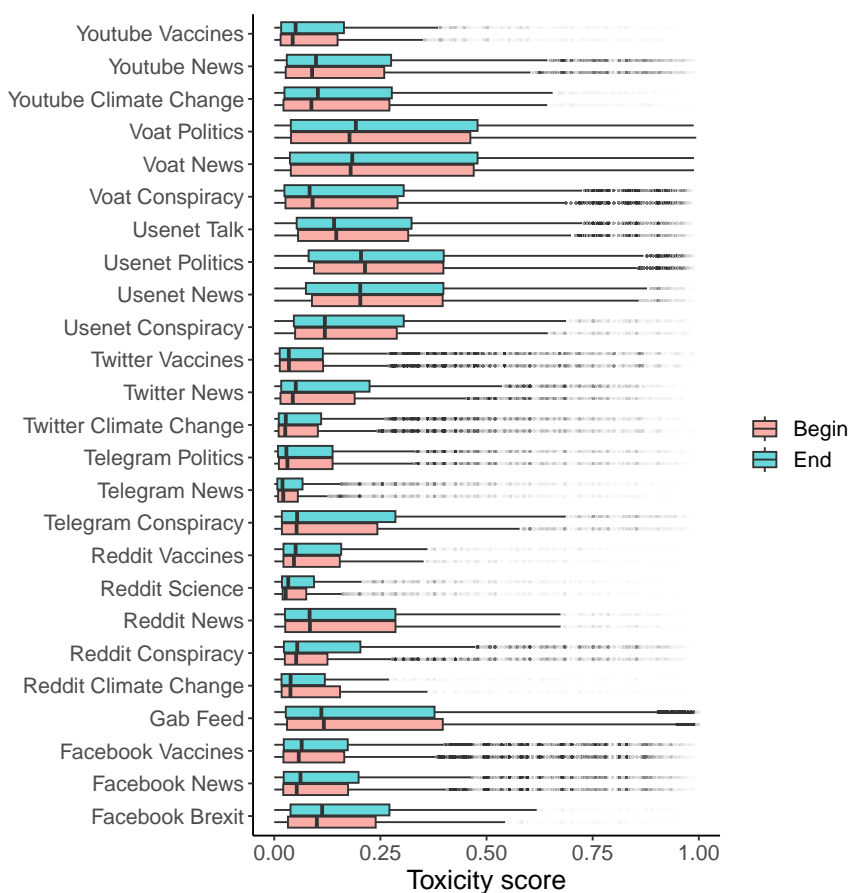

**Fig. S3: Short conversations are not short because of toxicity.** Each plot shows the box plot of the toxicity distribution for the first three (“begin” label) and last three comments (“end” label) of conversations composed of 6 – 20 comments. No significant differences appear between the distributions. In general, the last comments are not more toxic than those preceding them. For Facebook news, a subsample containing 6.654.500 total comments was used. The summary characteristics of each box plot are shown in Tab. S15.

## 4 Software and Coding specifications

Here we report the specifications about the softwares employed and the coding process to develop this paper.

## 4.1 Softwares Employed

Code development was made with R 4.3.2, RStudio 2023.12.0-369, Python 3.10.11, Visual Studio Code 1.86.1, Docker Desktop 4.27.2 (137060)

## 4.2 List of R packages

**Table S17:** List of R packages with their own versions.

---

| Package      | Version   |
|--------------|-----------|
| DBI          | 1.2.1     |
| MASS         | 7.3-60    |
| Matrix       | 1.6-5     |
| MatrixModels | 0.5-3     |
| R6           | 2.5.1     |
| RColorBrewer | 1.1-3     |
| RPostgreSQL  | 0.7-6     |
| Rcpp         | 1.0.11    |
| RcppEigen    | 0.3.3.9.4 |
| RcppTOML     | 0.2.2     |
| SparseM      | 1.81      |
| abind        | 1.4-5     |
| arrow        | 13.0.0.1  |
| askpass      | 1.2.0     |
| assertthat   | 0.2.1     |
| backports    | 1.4.1     |
| bit          | 4.0.5     |
| bit64        | 4.0.5     |
| boot         | 1.3-28.1  |
| brio         | 1.1.4     |
| broom        | 1.0.5     |
| bursts       | 1.0-2     |
| callr        | 3.7.3     |
| car          | 3.1-2     |
| carData      | 3.0-5     |
| cli          | 3.6.1     |
| clipr        | 0.8.0     |
| colorspace   | 2.1-0     |
| common       | 1.0.9     |
| corrplot     | 0.92      |
| cowplot      | 1.1.2     |
| cpp11        | 0.4.6     |
| crayon       | 1.5.2     |
| curl         | 5.2.0     |

---

Table S17

---

| <b>Package</b> | <b>Version</b> |
|----------------|----------------|
| data.table     | 1.14.8         |
| datetime       | 0.1.4          |
| desc           | 1.4.3          |
| diffobj        | 0.3.5          |
| digest         | 0.6.33         |
| dplyr          | 1.1.3          |
| ellipsis       | 0.3.2          |
| evaluate       | 0.21           |
| extraDistr     | 1.10.0         |
| fansi          | 1.0.4          |
| farver         | 2.1.1          |
| fs             | 1.6.3          |
| generics       | 0.1.3          |
| ggplot2        | 3.4.3          |
| ggpubr         | 0.6.0          |
| ggrepel        | 0.9.5          |
| ggsci          | 3.0.0          |
| ggsignif       | 0.6.4          |
| glue           | 1.6.2          |
| gridExtra      | 2.3            |
| gtable         | 0.3.4          |
| here           | 1.0.1          |
| hms            | 1.1.3          |
| httr           | 1.4.7          |
| isoband        | 0.2.7          |
| jsonlite       | 1.8.7          |
| labeling       | 0.4.3          |
| lattice        | 0.21-8         |
| lifecycle      | 1.0.3          |
| lme4           | 1.1-35.1       |
| log4r          | 0.4.3          |
| logr           | 1.3.4          |
| lubridate      | 1.9.2          |
| magrittr       | 2.0.3          |
| mgcv           | 1.8-42         |
| mime           | 0.12           |
| minqa          | 1.2.6          |
| munsell        | 0.5.0          |
| ndjson         | 0.9.0          |
| nlme           | 3.1-162        |
| nloptr         | 2.0.3          |
| nnet           | 7.3-19         |

---

Table S17

---

| <b>Package</b> | <b>Version</b> |
|----------------|----------------|
| numDeriv       | 2016.8-1.1     |
| openssl        | 2.1.1          |
| patchwork      | 1.2.0          |
| pbkrtest       | 0.5.2          |
| pillar         | 1.9.0          |
| pkgbuild       | 1.4.3          |
| pkgconfig      | 2.0.3          |
| pkgload        | 1.3.4          |
| plyr           | 1.8.8          |
| png            | 0.1-8          |
| polynom        | 1.4-1          |
| praise         | 1.0.0          |
| prettyunits    | 1.2.0          |
| processx       | 3.8.3          |
| progress       | 1.2.2          |
| ps             | 1.7.6          |
| purrr          | 1.0.2          |
| quantreg       | 5.97           |
| rappdirs       | 0.3.3          |
| readr          | 2.1.4          |
| rematch2       | 2.1.2          |
| renv           | 1.0.3          |
| reticulate     | 1.34.0         |
| rlang          | 1.1.1          |
| rprojroot      | 2.0.4          |
| rstatix        | 0.7.2          |
| scales         | 1.2.1          |
| stringi        | 1.7.12         |
| stringr        | 1.5.0          |
| survival       | 3.5-7          |
| sys            | 3.4.2          |
| testthat       | 3.2.1          |
| tibble         | 3.2.1          |
| tidyr          | 1.3.0          |
| tidyselect     | 1.2.0          |
| timechange     | 0.2.0          |
| trend          | 1.1.6          |
| triebear       | 0.4.1          |
| tzdb           | 0.4.0          |
| urltools       | 1.7.3          |
| utf8           | 1.2.3          |
| vctrs          | 0.6.3          |

---

Table S17

---

| <b>Package</b> | <b>Version</b> |
|----------------|----------------|
| viridisLite    | 0.4.2          |
| vroom          | 1.6.3          |
| waldo          | 0.5.2          |
| withr          | 2.5.0          |
| xtable         | 1.8-4          |

---

## References

- [1] Schmidt, A., Zollo, F., Scala, A. & Quattrociocchi, W. Polarization rank: A study on european news consumption on facebook (2018). Preprint at <https://arxiv.org/abs/1805.08030>.
